# Supplementary material for: Impact of the degree of functionalization of graphene oxide on the electrochemical charge storage property and metal ion adsorption
Source: Royal Society of Chemistry journal article supplement (doi:10.1039/c4ra08862j), 2014-01-01
Supplement: c4ra08862j1.pdf [file c4ra08862j1.pdf]

## Impact of the Degree of Functionalization of Graphene oxide on the Electrochemical Charge Storage Property and Metal ion Adsorption

Mahesh M. Kadam, Omkar R. Lokare, Kota V.M.K. Kireeti, Vilas G. Gaikar and Neetu Jha\*

<sup>1</sup>Department of Chemical Engineering,  
Institute of Chemical Technology,  
Mumbai - 400019

### †Electronic Supplementary Information (ESI)

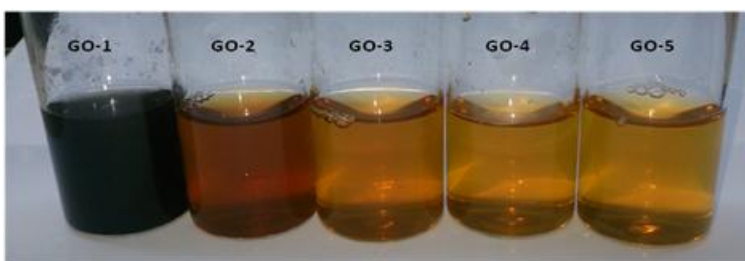

**Fig. S1** Pictorial presentation of the GO samples prepared

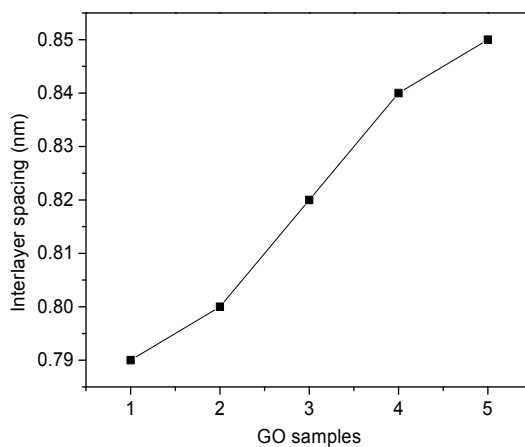

**Fig. S2** Interlayer spacing for GO samples with different degrees of oxidation.

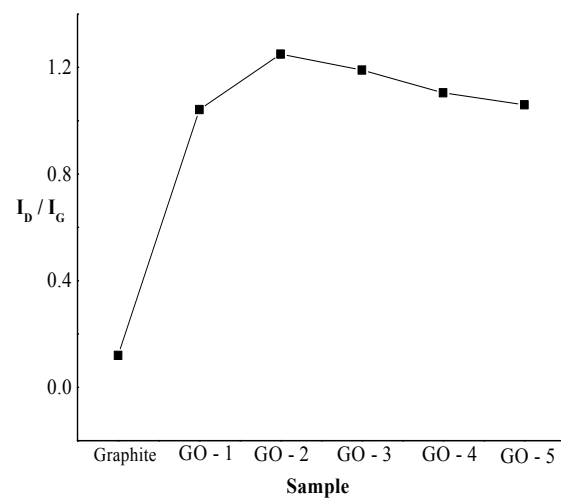

**Fig. S3** Plot  $I_D/I_G$  ratio for graphite and different GO samples (GO-1 to GO-5).

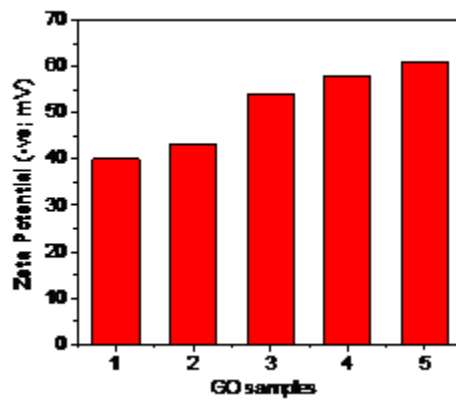

**Fig. S4** Plot of zeta potential vs. samples with different oxidation levels

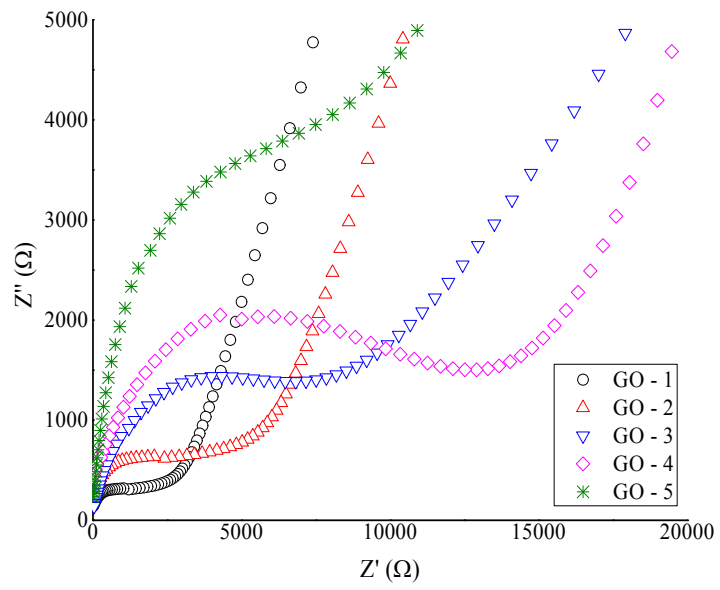

**Fig. S5:** Impedance vs frequency plot of GO1, GO-2, GO-3, GO-4 and GO-5 samples.
